# Supplementary material for: Body size prediction in scorpions: a phylogenetic comparative examination of linear measurements of individual body parts
Source: PeerJ journal article supplement (doi:10.7717/peerj.18621), 2025-01-17
Supplement: supp1.pdf [file supp1.pdf]

# Supporting information 1

Body size prediction in scorpions: a phylogenetic comparative examination of linear measurements of individual body parts

Stênio Í. A. Foerster\*

2024-11-06

## Contents

|                                                                      |    |
|----------------------------------------------------------------------|----|
| Species List . . . . .                                               | 2  |
| List of articles utilized for gathering morphological data . . . . . | 7  |
| ModelFinder results . . . . .                                        | 14 |
| Calibration points . . . . .                                         | 15 |
| R Function for defining lognormal priors . . . . .                   | 18 |
| Interaction models . . . . .                                         | 22 |
| Phylogenetic multiple regressions . . . . .                          | 25 |
| References . . . . .                                                 | 26 |

---

\*Department of Zoology, University of Tartu, Estonia. Contact: [stenio.foerster@ut.ee](mailto:stenio.foerster@ut.ee) | [stenioit@gmail.com](mailto:stenioit@gmail.com)

## Species List

List of scorpion species included in the phylogenetic and statistical analyses. Accession codes for new sequences are in blue. For each species, the number of male and female individuals used to calculate species means is provided, with missing data (“-”) for species included solely for reconstructing the phylogenetic tree.

| Species                           | Females | Males | Total | COI      | 16S      | 18S      | 28S      |
|-----------------------------------|---------|-------|-------|----------|----------|----------|----------|
| <i>Aegaeobuthus cyprius</i>       | 1       | 1     | 2     | DQ310849 | DQ310812 | -        | -        |
| <i>Aegaeobuthus nigrocinctus</i>  | 0       | 2     | 2     | ON255557 | ON262578 | -        | -        |
| <i>Alayotityus delacruzi</i>      | 4       | 4     | 8     | -        | DQ990826 | -        | -        |
| <i>Alayotityus juraguaensis</i>   | 1       | 0     | 1     | -        | DQ990827 | -        | -        |
| <i>Alayotityus nanus</i>          | 2       | 0     | 2     | -        | DQ990828 | -        | -        |
| <i>Alayotityus sierramaestrae</i> | 1       | 0     | 1     | -        | KY674447 | -        | -        |
| <i>Ananteris ashaninka</i>        | 1       | 1     | 2     | ON255558 | -        | ON259096 | ON259166 |
| <i>Ananteris balzanii</i>         | 2       | 5     | 7     | KY674491 | KY674448 | -        | KY674470 |
| <i>Ananteris franckeii</i>        | 5       | 5     | 10    | PQ341284 | -        | -        | -        |
| <i>Ananteris mauryi</i>           | 28      | 23    | 51    | PQ341283 | -        | -        | -        |
| <i>Ananteris platnicki</i>        | 1       | 1     | 2     | ON255559 | ON262579 | ON259097 | ON259167 |
| <i>Androctonus amoreuxi</i>       | 3       | 2     | 5     | ON255560 | ON262580 | -        | MW557083 |
| <i>Androctonus australis</i>      | 3       | 2     | 5     | ON255561 | ON262581 | ON259098 | ON259168 |
| <i>Androctonus bicolor</i>        | 2       | 3     | 5     | KF548120 | KJ538332 | -        | -        |
| <i>Androctonus bourdoni</i>       | 0       | 1     | 1     | ON255562 | ON262582 | -        | -        |
| <i>Androctonus crassicauda</i>    | 1       | 1     | 2     | ON255563 | ON262583 | GQ335459 | -        |
| <i>Androctonus gonneti</i>        | 1       | 0     | 1     | ON255564 | ON262584 | -        | -        |
| <i>Androctonus hoggarensis</i>    | 2       | 1     | 3     | JN018150 | -        | JN018267 | JN018364 |
| <i>Androctonus liouvillei</i>     | 1       | 1     | 2     | -        | ON262585 | -        | ON259170 |
| <i>Androctonus mauritanicus</i>   | 1       | 2     | 3     | ON255565 | ON262586 | ON259099 | ON259169 |
| <i>Androctonus sergenti</i>       | 1       | 0     | 1     | ON255566 | ON262587 | ON259100 | ON259171 |
| <i>Babycurus gigas</i>            | 1       | 2     | 3     | ON255569 | ON262590 | ON259103 | ON259174 |
| <i>Barbaracurus sofomarensis</i>  | 1       | 2     | 3     | ON255570 | ON262591 | ON259104 | ON259175 |
| <i>Barbaracurus zambonellii</i>   | 1       | 1     | 2     | ON255571 | ON262592 | ON259105 | ON259176 |
| <i>Buthacus occidentalis</i>      | 0       | 1     | 1     | JN018151 | -        | JN018268 | JN018365 |
| <i>Buthacus stockmanni</i>        | 1       | 1     | 2     | ON255572 | ON262593 | ON259106 | ON259177 |
| <i>Buthaeolus harrisoni</i>       | 2       | 2     | 4     | ON255573 | ON262594 | ON259107 | ON259178 |
| <i>Buthoscorpio sarasinorum</i>   | 1       | 0     | 1     | ON255574 | ON262595 | ON259108 | ON259179 |
| <i>Buthus albengai</i>            | 1       | 0     | 1     | JN885909 | -        | -        | -        |
| <i>Buthus atlantis</i>            | 1       | 1     | 2     | ON255575 | ON262596 | ON259109 | ON259180 |
| <i>Buthus awashensis</i>          | 1       | 1     | 2     | ON255576 | ON262597 | ON259110 | ON259181 |
| <i>Buthus draa</i>                | 1       | 1     | 2     | ON255577 | ON262598 | -        | -        |
| <i>Buthus elmoutaouakili</i>      | 0       | 1     | 1     | ON255578 | ON262599 | -        | ON259182 |
| <i>Buthus lienhardi</i>           | 1       | 1     | 2     | ON255579 | ON262600 | -        | -        |
| <i>Buthus malhommei</i>           | 1       | 1     | 2     | JN885935 | -        | -        | -        |
| <i>Buthus mardochei</i>           | 1       | 1     | 2     | ON255580 | ON262601 | -        | ON259183 |
| <i>Buthus maroccanus</i>          | 2       | 0     | 2     | ON255581 | -        | ON259111 | ON259184 |
| <i>Buthus occitanus</i>           | 1       | 2     | 3     | ON255582 | ON262602 | -        | -        |
| <i>Buthus paris</i>               | 2       | 2     | 4     | ON255583 | ON262603 | -        | -        |
| <i>Centruroides arctimanus</i>    | 1       | 1     | 2     | MK479161 | MK479008 | MK479059 | MK479110 |
| <i>Centruroides baerji</i>        | 1       | 1     | 2     | MK479162 | MK479009 | MK479060 | ON259185 |
| <i>Centruroides balsasensis</i>   | 1       | 1     | 2     | MK479163 | MK479010 | MK479061 | MK479112 |
| <i>Centruroides baracoae</i>      | 6       | 6     | 12    | ON255586 | ON262606 | ON259112 | ON259187 |
| <i>Centruroides barbudensis</i>   | 1       | 1     | 2     | MK479165 | MK479012 | MK479063 | MK479114 |

Continues on the next page

| Species                            | Females | Males | Total | COI      | 16S      | 18S      | 28S      |
|------------------------------------|---------|-------|-------|----------|----------|----------|----------|
| <i>Centruroides borinquensis</i>   | 1       | 1     | 2     | MK479167 | MK479014 | MK479065 | MK479116 |
| <i>Centruroides chamulaensis</i>   | 2       | 2     | 4     | MK479168 | MK479015 | MK479066 | MK479117 |
| <i>Centruroides edwardsii</i>      | 3       | 4     | 7     | MK479169 | MK479016 | MK479067 | MK479118 |
| <i>Centruroides elegans</i>        | 1       | 1     | 2     | MK479170 | MK479017 | MK479068 | MK479119 |
| <i>Centruroides exilimanus</i>     | 2       | 2     | 4     | MK479171 | MK479018 | MK479069 | MK479120 |
| <i>Centruroides farri</i>          | 1       | 0     | 1     | MK479172 | MK479019 | MK479070 | MK479121 |
| <i>Centruroides flavopictus</i>    | 0       | 3     | 3     | MK479173 | MK479020 | MK479071 | MK479122 |
| <i>Centruroides gracilis</i>       | 5       | 4     | 9     | KY982180 | KY981894 | KY981989 | ON259189 |
| <i>Centruroides guanensis</i>      | 3       | 3     | 6     | MK479211 | MK479058 | MK479109 | MK479160 |
| <i>Centruroides hoffmanni</i>      | 2       | 1     | 3     | MZ429061 | MK479025 | MK479076 | ON259190 |
| <i>Centruroides infamatus</i>      | 2       | 1     | 3     | KY982181 | KY981895 | KY981990 | MK479128 |
| <i>Centruroides limpidus</i>       | 0       | 3     | 3     | MK479184 | MK479031 | MK479082 | MK479133 |
| <i>Centruroides luceorum</i>       | 3       | 0     | 3     | MK479185 | MK479032 | MK479083 | MK479134 |
| <i>Centruroides lucidus</i>        | 3       | 4     | 7     | ON255590 | ON262610 | -        | ON259191 |
| <i>Centruroides marcanoi</i>       | 0       | 4     | 4     | MK479186 | MK479033 | MK479084 | ON259192 |
| <i>Centruroides meisei</i>         | 6       | 6     | 12    | MK479187 | MK479034 | MK479085 | MK479136 |
| <i>Centruroides meridionalis</i>   | 0       | 2     | 2     | MK479189 | MK479035 | MK479086 | MK479137 |
| <i>Centruroides nigrimanus</i>     | 1       | 2     | 3     | MK479191 | MK479038 | MK479089 | MK479140 |
| <i>Centruroides nigrovariatus</i>  | 1       | 2     | 3     | MK479192 | MK479039 | MK479090 | MK479141 |
| <i>Centruroides nozius</i>         | 2       | 2     | 4     | MK479193 | MK479040 | MK479091 | MK479142 |
| <i>Centruroides ochraceus</i>      | 2       | 2     | 4     | MK479194 | MK479041 | MK479092 | MK479143 |
| <i>Centruroides ornatus</i>        | 3       | 2     | 5     | MK479195 | MK479042 | MK479093 | MK479144 |
| <i>Centruroides platnicki</i>      | 3       | 2     | 5     | MK479196 | MK479043 | MK479094 | MK479145 |
| <i>Centruroides pococki</i>        | 1       | 1     | 2     | MK479197 | MK479044 | MK479095 | MK479146 |
| <i>Centruroides rileyi</i>         | 3       | 4     | 7     | KY982183 | KY981897 | KY981992 | KY982087 |
| <i>Centruroides robertoi</i>       | 1       | 1     | 2     | ON255592 | ON262612 | -        | ON259193 |
| <i>Centruroides schmidtii</i>      | 7       | 8     | 15    | KY982184 | KY981898 | KY981993 | KY982089 |
| <i>Centruroides serrano</i>        | 1       | 1     | 2     | MK479200 | MK479047 | MK479098 | MK479149 |
| <i>Centruroides simplex</i>        | 1       | 1     | 2     | MK479202 | MK479048 | MK479099 | MK479154 |
| <i>Centruroides sissomi</i>        | 1       | 0     | 1     | MK479201 | MK479049 | MK479100 | MK479150 |
| <i>Centruroides taino</i>          | 4       | 4     | 8     | MK479204 | MK479051 | MK479102 | MK479152 |
| <i>Centruroides tapachulaensis</i> | 4       | 4     | 8     | MK479205 | MK479052 | MK479103 | MK479153 |
| <i>Centruroides testaceus</i>      | 2       | 1     | 3     | MK479207 | MK479054 | MK479105 | MK479155 |
| <i>Centruroides thorellii</i>      | 1       | 1     | 2     | MK479208 | MK479055 | MK479106 | MK479157 |
| <i>Centruroides tuxtla</i>         | 1       | 1     | 2     | MK479209 | MK479056 | MK479107 | MK479158 |
| <i>Centruroides vittatus</i>       | 0       | 1     | 1     | KY982185 | KY981899 | KY981994 | MK479159 |
| <i>Chaneke hofereki</i>            | 1       | 2     | 3     | ON255594 | ON262613 | ON259116 | ON259195 |
| <i>Charmus laneus</i>              | 2       | 0     | 2     | ON255595 | ON262614 | ON259117 | ON259196 |
| <i>Compsobuthus arabicus</i>       | 1       | 1     | 2     | -        | AY226177 | -        | -        |
| <i>Compsobuthus eritreensis</i>    | 1       | 1     | 2     | ON255597 | ON262616 | ON259118 | ON259198 |
| <i>Compsobuthus somalilandus</i>   | 1       | 1     | 2     | ON255600 | -        | -        | -        |
| <i>Femtobuthus shutuae</i>         | 1       | 1     | 2     | ON255601 | ON262620 | ON259119 | ON259201 |
| <i>Gint amoudensis</i>             | 2       | 2     | 4     | OM722200 | OM809158 | -        | -        |
| <i>Gint banfasae</i>               | 1       | 2     | 3     | OM722193 | OM809151 | -        | -        |
| <i>Gint calviceps</i>              | 0       | 1     | 1     | -        | OM809149 | -        | -        |
| <i>Gint dabakalo</i>               | 1       | 1     | 2     | OM722190 | OM809147 | -        | -        |
| <i>Gint gaitako</i>                | 1       | 1     | 2     | OM722188 | OM809145 | ON259120 | ON259202 |
| <i>Gint gubanensis</i>             | 0       | 1     | 1     | OM722182 | OM809139 | -        | -        |
| <i>Gint maidensis</i>              | 1       | 1     | 2     | OM722180 | OM809137 | -        | -        |
| <i>Grosphus madagascariensis</i>   | 1       | 1     | 2     | ON255602 | ON262621 | ON259121 | ON259203 |
| <i>Heteroctenus abudi</i>          | 4       | 3     | 7     | KY982186 | ON262622 | KY981995 | ON259204 |
| <i>Heteroctenus bonettii</i>       | 4       | 3     | 7     | KY982189 | KY981903 | KY981998 | KY982094 |
| <i>Heteroctenus garridoi</i>       | 1       | 1     | 2     | KY982191 | KY981905 | KY982000 | KY982096 |
| <i>Heteroctenus junceus</i>        | 4       | 4     | 8     | KY982198 | KY981912 | KY982007 | KY982097 |
| <i>Heteroctenus princeps</i>       | 3       | 4     | 7     | KY982200 | KY981914 | KY982009 | ON259205 |
| <i>Hottentotta flavidulus</i>      | 2       | 0     | 2     | ON255606 | ON262625 | -        | ON259207 |

Continues on the next page

| Species                           | Females | Males | Total | COI      | 16S      | 18S        | 28S      |
|-----------------------------------|---------|-------|-------|----------|----------|------------|----------|
| <i>Hottentotta franzwerneri</i>   | 0       | 1     | 1     | JF820094 | -        | -          | -        |
| <i>Hottentotta gentili</i>        | 1       | 1     | 2     | ON255607 | ON262626 | -          | ON259208 |
| <i>Hottentotta hottentotta</i>    | 1       | 0     | 1     | ON255608 | ON262627 | ON259124   | ON259209 |
| <i>Hottentotta tamulus</i>        | 1       | 1     | 2     | KT716032 | -        | -          | -        |
| <i>Ischnotelson peruassu</i>      | 1       | 1     | 2     | KY982208 | KY981922 | KY982017   | KY982112 |
| <i>Isometrus maculatus</i>        | 11      | 5     | 16    | KY982207 | KY981921 | KY982016   | KY982111 |
| <i>Isometrus thwaitesi</i>        | 1       | 0     | 1     | ON255611 | ON262630 | ON259126   | ON259212 |
| <i>Jaguajir agamemnon</i>         | 1       | 0     | 1     | KY982209 | KY981923 | KY982018   | KY982113 |
| <i>Jaguajir pintoii</i>           | 2       | 2     | 4     | KY982220 | KY981934 | KY982029   | KY982124 |
| <i>Jaguajir rochae</i>            | 15      | 15    | 30    | KY982224 | KY981938 | KY982033   | KY982128 |
| <i>Karasbergia methueni</i>       | 1       | 0     | 1     | ON255613 | ON262632 | ON259128   | ON259214 |
| <i>Leiurus abdullahbayrami</i>    | 2       | 1     | 3     | ON255614 | ON262633 | ON259129   | ON259215 |
| <i>Leiurus quinquestriatus</i>    | 3       | 2     | 5     | JQ514258 | JQ514241 | -          | -        |
| <i>Lissothus occidentalis</i>     | 0       | 1     | 1     | ON255615 | ON262634 | ON259130   | ON259216 |
| <i>Lychas mucronatus</i>          | 3       | 2     | 5     | JN018153 | AF370855 | JN018270   | JN018367 |
| <i>Lychas obsti</i>               | 1       | 1     | 2     | ON255616 | ON262635 | ON259131   | ON259217 |
| <i>Lychas scutillus</i>           | 1       | 1     | 2     | ON255617 | ON262636 | -          | ON259218 |
| <i>Mesobuthus afghanus</i>        | 1       | 1     | 2     | AJ550707 | -        | -          | -        |
| <i>Mesobuthus eupeus</i>          | 1       | 1     | 2     | AJ550701 | AY228141 | -          | -        |
| <i>Mesobuthus haarlovi</i>        | 0       | 2     | 2     | ON255618 | ON262637 | ON259132   | ON259219 |
| <i>Mesobuthus philippovitschi</i> | 1       | 1     | 2     | HM567348 | -        | -          | -        |
| <i>Mesobuthus phillipsi</i>       | 1       | 1     | 2     | ON255619 | ON262638 | ON259133   | ON259220 |
| <i>Mesobuthus thersites</i>       | 1       | 1     | 2     | AJ550700 | -        | -          | -        |
| <i>Microbuthus gardneri</i>       | 1       | 1     | 2     | ON255620 | ON262639 | ON259134   | ON259221 |
| <i>Microbuthus kristensenorum</i> | 2       | 0     | 2     | ON255621 | ON262640 | ON259135   | ON259222 |
| <i>Microbuthus satyrus</i>        | 1       | 1     | 2     | ON255622 | ON262641 | ON259136   | ON259223 |
| <i>Microtityus consuelo</i>       | 3       | 3     | 6     | ON255623 | ON262642 | -          | ON259224 |
| <i>Microtityus fundorai</i>       | 1       | 1     | 2     | -        | DQ990830 | -          | -        |
| <i>Microtityus solegladi</i>      | 2       | 2     | 4     | ON255624 | ON262643 | ON259137   | ON259225 |
| <i>Neobuthus awashensis</i>       | 1       | 1     | 2     | ON255625 | ON262644 | -          | -        |
| <i>Neobuthus eritreaensis</i>     | 1       | 1     | 2     | ON255626 | ON262645 | ON259138   | ON259226 |
| <i>Neobuthus kutcheri</i>         | 2       | 2     | 4     | OM722176 | OM809133 | -          | -        |
| <i>Odontobuthus brevidigitus</i>  | 1       | 1     | 2     | ON255627 | ON262646 | ON259139   | ON259227 |
| <i>Odontobuthus tavighiaie</i>    | 1       | 1     | 2     | KF701324 | KJ659599 | -          | -        |
| <i>Odontobuthus tirgari</i>       | 1       | 1     | 2     | KF701322 | KJ659602 | -          | -        |
| <i>Olivierus caucasicus</i>       | 0       | 2     | 2     | MG586931 | MG586916 | -          | -        |
| <i>Olivierus elenae</i>           | 1       | 0     | 1     | AJ783604 | MG586917 | -          | -        |
| <i>Olivierus gorelovi</i>         | 1       | 1     | 2     | AJ783515 | -        | -          | -        |
| <i>Olivierus intermedius</i>      | 1       | 1     | 2     | MG586940 | MG586926 | -          | -        |
| <i>Olivierus kreuzbergi</i>       | 1       | 1     | 2     | AJ550697 | MG586929 | -          | -        |
| <i>Olivierus martensii</i>        | 1       | 1     | 2     | DQ340065 | -        | FJ948787.1 | FJ948787 |
| <i>Olivierus nenilini</i>         | 1       | 1     | 2     | AJ783522 | -        | -          | -        |
| <i>Orthochirus afghanus</i>       | 1       | 0     | 1     | ON255630 | ON262649 | -          | -        |
| <i>Orthochirus innesi</i>         | 3       | 1     | 4     | ON255632 | ON262651 | ON259142   | ON259230 |
| <i>Parabuthus kajibu</i>          | 1       | 1     | 2     | ON255634 | ON262653 | ON259144   | ON259232 |
| <i>Physoctonus debilis</i>        | 23      | 15    | 38    | KY982238 | KY981952 | KY982048   | KY982143 |
| <i>Physoctonus striatus</i>       | 0       | 2     | 2     | KY982241 | KY981955 | KY982051   | KY982146 |
| <i>Picobuthus wahibaensis</i>     | 1       | 1     | 2     | ON255636 | ON262655 | ON259145   | ON259234 |
| <i>Reddyanus basilicus</i>        | 0       | 1     | 1     | ON255638 | ON262658 | ON259148   | ON259237 |
| <i>Reddyanus ceylonensis</i>      | 1       | 1     | 2     | ON255639 | ON262659 | -          | ON259238 |
| <i>Reddyanus petrzekai</i>        | 1       | 1     | 2     | ON255641 | ON262661 | ON259150   | ON259240 |
| <i>Rhopalurus caribensis</i>      | 1       | 1     | 2     | KY982243 | KY981957 | KY982053   | KY982147 |
| <i>Rhopalurus laticauda</i>       | 4       | 7     | 11    | KY982247 | KY981961 | KY982057   | KY982149 |
| <i>Rhopalurus ochoai</i>          | 3       | 3     | 6     | MF508635 | MF402014 | MF508621   | MF508628 |
| <i>Somalicharmus whitmanae</i>    | 0       | 1     | 1     | ON255642 | ON262662 | ON259151   | ON259241 |
| <i>Thaicharmus mahunkai</i>       | 2       | 0     | 2     | ON255644 | ON262664 | ON259153   | ON259243 |

Continues on the next page

| Species                              | Females | Males | Total | COI      | 16S      | 18S      | 28S      |
|--------------------------------------|---------|-------|-------|----------|----------|----------|----------|
| <i>Tityus argentinus</i>             | 1       | 1     | 2     | KY674493 | KY674452 | -        | KY674474 |
| <i>Tityus atriventer</i>             | 0       | 1     | 1     | KY982264 | KY981978 | KY982074 | -        |
| <i>Tityus bahiensis</i>              | 1       | 1     | 2     | KY982265 | KY981979 | KY982075 | OK493233 |
| <i>Tityus blaseri</i>                | 1       | 1     | 2     | OK561901 | OK493248 | -        | OK493221 |
| <i>Tityus braziliae</i>              | 7       | 1     | 8     | PQ341280 | OK493239 | -        | OK493225 |
| <i>Tityus cf. stigmurus SF247</i>    | 4       | 6     | 10    | PQ341281 | -        | -        | -        |
| <i>Tityus cf. stigmurus SF464</i>    | 0       | 3     | 3     | PQ341282 | -        | -        | -        |
| <i>Tityus clathratus</i>             | 1       | 5     | 6     | KY982266 | KY981980 | KY982076 | KY982171 |
| <i>Tityus confluens</i>              | 2       | 2     | 4     | KY674496 | KY674456 | -        | KY674478 |
| <i>Tityus crassimanus</i>            | 0       | 2     | 2     | ON255647 | ON262667 | ON259156 | ON259246 |
| <i>Tityus curupi</i>                 | 1       | 1     | 2     | KY674440 | KY674424 | -        | KY674429 |
| <i>Tityus discrepans</i>             | 1       | 1     | 2     | KY982267 | KY981981 | KY982077 | KY982172 |
| <i>Tityus elii</i>                   | 1       | 2     | 3     | -        | ON262669 | -        | ON259248 |
| <i>Tityus forcipula</i>              | 2       | 2     | 4     | OK561898 | OK493251 | -        | OK493230 |
| <i>Tityus gaffini</i>                | 1       | 1     | 2     | ON255649 | ON262670 | -        | ON259249 |
| <i>Tityus kuryi</i>                  | 11      | 2     | 13    | KY982268 | KY981982 | KY982078 | KY982173 |
| <i>Tityus mattogrossensis</i>        | 2       | 2     | 4     | KY674498 | KY674458 | -        | KY674480 |
| <i>Tityus neglectus</i>              | 1       | 4     | 5     | PQ341279 | -        | -        | -        |
| <i>Tityus neibae</i>                 | 1       | 1     | 2     | ON255650 | ON262671 | ON259158 | ON259250 |
| <i>Tityus nematochirus</i>           | 1       | 1     | 2     | OL416036 | -        | -        | OL416386 |
| <i>Tityus obscurus</i>               | 0       | 1     | 1     | OK561905 | OK493243 | -        | OK493229 |
| <i>Tityus panguana</i>               | 1       | 1     | 2     | OK561908 | OK493244 | -        | OK493231 |
| <i>Tityus paraguayensis</i>          | 1       | 1     | 2     | KY674499 | -        | -        | -        |
| <i>Tityus pictus microdon</i>        | 1       | 2     | 3     | KY982271 | KY981985 | KY982081 | KY982176 |
| <i>Tityus potameis</i>               | 1       | 1     | 2     | OK561899 | OK493245 | -        | OK493232 |
| <i>Tityus pusillus</i>               | 30      | 30    | 60    | PQ341278 | -        | KP276456 | KP276376 |
| <i>Tityus serrulatus</i>             | 3       | 2     | 5     | OK561900 | OK493247 | -        | OK493220 |
| <i>Tityus smithii</i>                | 2       | 2     | 4     | ON255651 | ON262672 | ON259159 | ON259251 |
| <i>Tityus spelaeus</i>               | 17      | 0     | 17    | -        | OK493249 | -        | OK493224 |
| <i>Tityus stigmurus</i>              | 10      | 4     | 14    | OK561896 | OK493240 | -        | OK493227 |
| <i>Tityus uruguayensis</i>           | 1       | 1     | 2     | KY674445 | KY674428 | -        | KY674484 |
| <i>Troglorhopalurus lacrau</i>       | 1       | 0     | 1     | MF508640 | MF508619 | MF508626 | MF508632 |
| <i>Troglorhopalurus translucidus</i> | 4       | 2     | 6     | MF508641 | MF508620 | MF508627 | MF508634 |
| <i>Trypanothacus barnesi</i>         | 1       | 1     | 2     | ON255652 | ON262673 | ON259160 | ON259252 |
| <i>Vachoniolus globimanus</i>        | 1       | 1     | 2     | -        | AY226179 | -        | -        |
| <i>Xenobuthus xanthus</i>            | 2       | 1     | 3     | ON255657 | ON262679 | ON259164 | ON259258 |
| <i>Zabius birabeni</i>               | 1       | 1     | 2     | KY982272 | KY981986 | KY982082 | KY674485 |
| <i>Zabius fuscus</i>                 | 1       | 1     | 2     | KY982273 | KY981987 | KY982083 | KY674486 |
| <i>Aegaeobuthus gibbosus</i>         | -       | -     | -     | ON255556 | ON262577 | ON259095 | ON259165 |
| <i>Ananteris sp. R033MACr35702</i>   | -       | -     | -     | KY674492 | KY674449 | -        | KY674471 |
| <i>Androctonus sp.</i>               | -       | -     | -     | ON255567 | ON262588 | ON259101 | ON259172 |
| <i>Apistobuthus pterygocercus</i>    | -       | -     | -     | ON255568 | ON262589 | ON259102 | ON259173 |
| <i>Centruroides bani</i>             | -       | -     | -     | MK479164 | ON262605 | MK479062 | ON259186 |
| <i>Centruroides bicolor</i>          | -       | -     | -     | MK479166 | MK479013 | MK479064 | MK479115 |
| <i>Centruroides exilicauda</i>       | -       | -     | -     | KY982179 | KY981893 | KY981988 | KY982084 |
| <i>Centruroides fulvipes</i>         | -       | -     | -     | MK479174 | MK479021 | MK479072 | ON259188 |
| <i>Centruroides griseus</i>          | -       | -     | -     | MK479176 | MK479023 | MK479074 | MK479125 |
| <i>Centruroides hentzi</i>           | -       | -     | -     | MK479177 | MK479024 | MK479075 | MK479126 |
| <i>Centruroides insulanus</i>        | -       | -     | -     | MK479180 | MK479027 | MK479079 | MK479129 |
| <i>Centruroides insularis</i>        | -       | -     | -     | MK479181 | MK479028 | MK479078 | MK479130 |
| <i>Centruroides koesteri</i>         | -       | -     | -     | MK479182 | MK479029 | MK479080 | MK479131 |
| <i>Centruroides limbatus</i>         | -       | -     | -     | MK479183 | MK479030 | MK479081 | MK479132 |
| <i>Centruroides morenoi</i>          | -       | -     | -     | MK479188 | MK479036 | MK479087 | MK479138 |
| <i>Centruroides nigrescens</i>       | -       | -     | -     | MK479190 | MK479037 | MK479088 | MK479139 |
| <i>Centruroides pallidiceps</i>      | -       | -     | -     | AY995836 | -        | -        | -        |
| <i>Centruroides sasae</i>            | -       | -     | -     | MK479198 | MK479045 | MK479096 | MK479147 |

Continues on the next page

| Species                           | Females | Males | Total | COI      | 16S      | 18S      | 28S      |
|-----------------------------------|---------|-------|-------|----------|----------|----------|----------|
| <i>Centruroides sculpturatus</i>  | -       | -     | -     | MK479199 | MK479046 | MK479097 | MK479148 |
| <i>Centruroides suffusus</i>      | -       | -     | -     | MK479203 | MK479050 | MK479101 | MK479151 |
| <i>Centruroides tecomanus</i>     | -       | -     | -     | MK479206 | MK479053 | MK479104 | MK479156 |
| <i>Compsobuthus acutecaritus</i>  | -       | -     | -     | ON255596 | ON262615 | -        | ON259197 |
| <i>Compsobuthus acaindroni</i>    | -       | -     | -     | ON255598 | ON262617 | -        | ON259199 |
| <i>Compsobuthus matthiesseni</i>  | -       | -     | -     | ON255599 | ON262618 | -        | ON259200 |
| <i>Compsobuthus sp.</i>           | -       | -     | -     | -        | ON262619 | -        | -        |
| <i>Hottentotta conspersus</i>     | -       | -     | -     | ON255605 | ON262624 | ON259123 | ON259206 |
| <i>Hottentotta jabalpurensis</i>  | -       | -     | -     | MK696578 | -        | -        | -        |
| <i>Hottentotta jayakari</i>       | -       | -     | -     | -        | AY226176 | -        | -        |
| <i>Hottentotta minusalta</i>      | -       | -     | -     | ON255609 | ON262628 | -        | ON259210 |
| <i>Hottentotta pachyurus</i>      | -       | -     | -     | KT716023 | -        | -        | -        |
| <i>Hottentotta rugiscutis</i>     | -       | -     | -     | KT716025 | -        | -        | -        |
| <i>Hottentotta trilineatus</i>    | -       | -     | -     | ON255610 | ON262629 | ON259125 | ON259211 |
| <i>Hottentotta vinchu</i>         | -       | -     | -     | MH820411 | -        | -        | -        |
| <i>Ischnotelson guambiensis</i>   | -       | -     | -     | KY982205 | KY981919 | KY982014 | KY982109 |
| <i>Janalychas srilankensis</i>    | -       | -     | -     | ON255612 | ON262631 | ON259127 | ON259213 |
| <i>Janalychas tricaris</i>        | -       | -     | -     | KT716037 | -        | -        | -        |
| <i>Odontobuthus bidentatus</i>    | -       | -     | -     | KF701316 | KJ659596 | -        | -        |
| <i>Odontobuthus doriae</i>        | -       | -     | -     | KF701313 | KJ659608 | -        | -        |
| <i>Olivierus fuscus</i>           | -       | -     | -     | MG586937 | MG586921 | -        | -        |
| <i>Olivierus kaznakovi</i>        | -       | -     | -     | ON255628 | ON262647 | ON259140 | ON259228 |
| <i>Olivierus longichelus</i>      | -       | -     | -     | PP229938 | -        | -        | -        |
| <i>Olivierus parthorum</i>        | -       | -     | -     | AJ783516 | -        | -        | -        |
| <i>Orthochiroides vachoni</i>     | -       | -     | -     | ON255629 | ON262648 | ON259141 | ON259229 |
| <i>Orthochirus bicolor</i>        | -       | -     | -     | KT716038 | -        | -        | -        |
| <i>Orthochirus fomichevi</i>      | -       | -     | -     | MT232527 | -        | -        | -        |
| <i>Orthochirus glabrifrons</i>    | -       | -     | -     | ON255631 | ON262650 | -        | -        |
| <i>Orthochirus iranus</i>         | -       | -     | -     | -        | MK170441 | -        | -        |
| <i>Parabuthus brevimanus</i>      | -       | -     | -     | ON255633 | ON262652 | ON259143 | ON259231 |
| <i>Parabuthus laevifrons</i>      | -       | -     | -     | JN018154 | -        | JN018271 | JN018368 |
| <i>Parabuthus pallidus</i>        | -       | -     | -     | ON255635 | ON262654 | -        | ON259233 |
| <i>Parabuthus transvaalicus</i>   | -       | -     | -     | JQ514247 | JQ514229 | -        | -        |
| <i>Reddyanus loebli</i>           | -       | -     | -     | ON255640 | ON262660 | ON259149 | ON259239 |
| <i>Teruelius flavopiceus</i>      | -       | -     | -     | ON255643 | ON262663 | ON259152 | ON259242 |
| <i>Thaicharmus sp.</i>            | -       | -     | -     | ON255645 | ON262665 | ON259154 | ON259244 |
| <i>Tityopsis inexpectata</i>      | -       | -     | -     | ON255646 | ON262666 | ON259155 | ON259245 |
| <i>Tityus carvalhoi</i>           | -       | -     | -     | KY674495 | KY674455 | -        | -        |
| <i>Tityus cf. bastosi</i>         | -       | -     | -     | KY674494 | KY674454 | -        | KY674476 |
| <i>Tityus charreyroni</i>         | -       | -     | -     | OK561903 | OK493237 | -        | OK493222 |
| <i>Tityus ecuadoriensis</i>       | -       | -     | -     | ON255648 | ON262668 | ON259157 | ON259247 |
| <i>Tityus metuendus</i>           | -       | -     | -     | KY982269 | KY981983 | KY982079 | KY982174 |
| <i>Tityus riverai</i>             | -       | -     | -     | KY982270 | KY981984 | KY982080 | -        |
| <i>Tityus sastrei</i>             | -       | -     | -     | OK561897 | OK493252 | -        | OK493234 |
| <i>Tityus soratensis</i>          | -       | -     | -     | KY674500 | KY674460 | -        | KY674482 |
| <i>Tityus trivittatus</i>         | -       | -     | -     | KY674501 | KY674461 | -        | -        |
| <i>Uroplectes emiliae</i>         | -       | -     | -     | ON255653 | ON262674 | -        | ON259253 |
| <i>Uroplectes fischeri</i>        | -       | -     | -     | ON255654 | ON262675 | ON259161 | ON259254 |
| <i>Uroplectes flavoviridis</i>    | -       | -     | -     | -        | ON262676 | ON259162 | ON259255 |
| <i>Uroplectes gracilior</i>       | -       | -     | -     | ON255655 | ON262677 | ON259163 | ON259256 |
| <i>Uroplectes otjimbinguensis</i> | -       | -     | -     | ON255656 | ON262678 | -        | ON259257 |
| <i>Zabius sp. 1 R007MACr36495</i> | -       | -     | -     | KY674505 | KY674465 | -        | KY674487 |
| <i>Zabius sp. 2 R010MACr36496</i> | -       | -     | -     | KY674506 | KY674466 | -        | KY674488 |
| <i>Zabius sp. 3 R034MACr36497</i> | -       | -     | -     | KY674507 | KY674467 | -        | KY674489 |
| <i>Zabius sp. 4 R035MACr36498</i> | -       | -     | -     | KY674508 | KY674468 | -        | KY674490 |
| <i>Brachistosternus paposo</i>    | -       | -     | -     | KT446990 | KT446655 | KT446767 | KT446879 |

## List of articles utilized for gathering morphological data

- Amr, Z. S., & El-Oran, R. (1994). Systematics and distribution of scorpions (Arachnida, Scorpionida) in Jordan. *Italian Journal of Zoology*, 61(2), 185–190.
- Armas, L. de. (1996). Presencia de *Centruroides schmidti* Sissom en el sureste de México y descripción de dos especies nuevas (Scorpiones: Buthidae). *Revista Nicaraguense de Entomología*, 36, 21–33.
- Armas, L. de. (2001). *Centruroides platnicki* Armas, 1981 (Scorpiones: Buthidae): First record from Turks Islands, Bahamas. *Revista Ibérica de Aracnología*, 4, 27–28.
- Armas, L. de, Luna-Sarmiento, D., & Flórez, E. (2012). Composición del género *Centruroides* Marx, 1890 (Scorpiones: Buthidae) en Colombia, con la descripción de una nueva especie. *Boletín de La Sociedad Entomológica Aragonesa (S.E.A.)*, 50, 105–114.
- Armas, L. de, & Martín-Frías, E. (1999). Complementos a la taxonomía de *Centruroides nigrovariatus* y *C. elegans* (Scorpiones: Buthidae) de México. *Anales de La Escuela Nacional de Ciencias Biológicas*, 44, 27–35.
- Armas, L. F. (1973). Escorpiones del Archipiélago Cubano: Nuevo Género y Nuevas Especies de Buthidae (Archinida: Scorpionida). *Poeyana*, 114, 1–28.
- Armas, L. F. (1974a). Escorpiones del archipiélago cubano. II. Hallazgo del género *Microtityus* (Scorpionida: Buthidae), con las descripciones de un nuevo subgénero y tres nuevas especies. *Poeyana*, 132, 1–26.
- Armas, L. F. (1974b). Escorpiones del Archipiélago Cubano IV. Nuevas especies de *Rhopalurus* (Scorpionida: Buthidae). *Poeyana*, 136, 1–12.
- Armas, L. F. (1976). Escorpiones del Archipiélago Cubano, V: Nuevas especies de *Centruroides* (Scorpionida; Buthidae). *Poeyana*, 146, 1–55.
- Armas, L. F. (1981). El genero *Centruroides* Marx, 1889 (Scorpiones: Buthidae), en Bahamas y Republica Dominicana. *Poeyana*, 223, 1–21.
- Armas, L. F. (1999a). Nueva especie de *Centruroides* (Scorpiones: Buthidae) de Chiapas, México. *Novitates Caribaea*, 1, 47–52.
- Armas, L. F. (1999b). Quince nuevos alacranes de La Española y Navassa, Antillas Mayores (Arachnida: Scorpiones). *Avicennia*, 10(11), 101–136.
- Armas, L. F. (2002). Alacranes de República Dominicana. *Centruroides nitidus* (Thorell, 1876) y *Microtityus lantiguai* Armas & Marcano Fondeur, 1992 (Scorpiones: Buthidae). *Revista Ibérica de Aracnología*, 5, 61–66.
- Armas, L. F., & Antun, A. J. A. (2004). Adiciones al género” *Tityus*” CL Koch, 1836 en República Dominicana, con la descripción de dos especies nuevas (Scorpiones: Buthidae). *Revista Ibérica de Aracnología*, 10, 53–64.
- Armas, L. F., Beutelspacher, C. R., & Martin, E. F. (1995). Notas sobre la taxonomia y distribuicion de algunos *Centruroides* (Scorpiones: Buthidae) de Mexico. *Revista Nicaraguense de Entomología*, 32, 29–43.
- Armas, L. F., & Frías, E. M. (2008). El género *Centruroides* Marx, 1890 (Scorpiones: Buthidae) en el estado de Veracruz, México. *Boletín de La Sociedad Entomológica Aragonesa (S.E.A.)*, 43, 7–22.
- Armas, L. F., & Marcano-Fondeur, E. J. (1987). Nuevos escorpiones (Arachnida: Scorpiones) de República Dominicana. *Poeyana*, 356, 1–28.
- Armas, L. F., & Marcano-Fondeur, E. J. (1992). Nuevos alacranes de República Dominicana (Arachnida: Scorpiones). *Poeyana*, 420, 1–36.
- Armas, L. F., & Teruel, R. (2012). Revisión del género *Microtityus* Kjellesvig-Waering, 1966 (Scorpiones: Buthidae) en República Dominicana. *Revista Ibérica de Aracnología*, 21, 69–88.
- Armas, L. F., Teruel, R., & Kovařík, F. (2011a). On *Centruroides margaritatus* (Gervais, 1841) and closely related species (Scorpiones: Buthidae). *Euscorpius*, 2011(132), 1–16.

- Armas, L. F., Teruel, R., & Kovařík, F. (2011b). Redescription of *Centruroides granosus* (Thorell, 1876) and identity of *Centruroides granosus simplex* Thorell, 1876 (Scorpiones: Buthidae). *Euscorpius*, 2011(127), 1–11.
- Armas, L. F., Trujillo, R. E., Viquez, C., & Agreda, E. O. (2010). Primer registro de *Centruroides tapachulaensis* Hoffmann, 1932 (Scorpiones: Buthidae) para Guatemala. *Boletín de La Sociedad Entomológica Aragonesa (S.E.A.)*, 46, 261–266.
- Baldazo-Monsivaiz, J. G., Ponce-Saavedra, J., & Flores-Moreno, M. (2013). Una especie nueva de alacrán del género *Centruroides* de importancia médica (Scorpiones: Buthidae) del estado de Guerrero, México. *Revista Mexicana de Biodiversidad*, 84(1), 100–116.
- Bohorquez Gomez, R. M. (2016). Revisión taxonómica y distribución geográfica de las especies de *Tityus*, Subgénero *Atreus*, (Scorpiones, Buthidae) presentes en Colombia [Master Thesis]. Universidad Nacional de Colombia.
- Botero-Trujillo, R. (2008). Redescription of *Tityus (Tityus) gaffini* Lourenço, 2000 (Scorpiones: Buthidae) and new locality records. *Revista Ibérica de Aracnología*, 16, 29–34.
- Coelho, P., Kaliontzopoulou, A., Rasko, M., & van der Meijden, A. (2017). A 'striking' relationship: Scorpion defensive behaviour and its relation to morphology and performance. *Functional Ecology*, 31(7), 1390–1404.
- Deshpande, S., Joshi, M., Kawai, K., Deb, A., Lee, J.-D., Bastawade, D., Gowande, G., & Sulakhe, S. (2023). Molecular and morphological confirmation of *Isometrus maculatus* (DeGeer, 1778) (Scorpiones: Buthidae) from Northeast India and East Asia. *Euscorpius*, 2023(374), 1–19.
- Di, Z.-Y., Cao, Z.-J., Wu, Y.-L., Zhu, L., Liu, H., & Li, W.-X. (2013). The scorpions of Hainan Island, China (Arachnida: Scorpiones). *Euscorpius*, 2013(153), 1–22.
- Esposito, L. A., Yamaguti, H. Y., Souza, C. A., Pinto-Da-Rocha, R., & Prendini, L. (2017). Systematic revision of the neotropical club-tailed scorpions, *Physoctonus*, *Rhopalurus*, and *Troglophopalus*, revalidation of *Heteroctenus*, and descriptions of two new genera and three new species (Buthidae: Rhopalurusinae). *Bulletin of the American Museum of Natural History*, 2017(415), 1–136.
- Fet, V., Hendrixson, B. E., Sissom, W. D., & Levy, G. (2000). First record for the genus *Mesobuthus* Vachon, 1950 in Israel: *Mesobuthus nigrocinctus* (Ehrenberg, 1828), n. Comb. (Scorpiones: Buthidae) from Mt. Hermon. *Israel Journal of Ecology and Evolution*, 46(4), 287–295.
- Fet, V., Kovařík, F., Gantenbein, B., Kaiser, R. C., Graham, M. R., & Stewart, A. K. (2018). Revision of the *Mesobuthus caucasicus* complex from Central Asia, with descriptions of six new species (Scorpiones: Buthidae). *Euscorpius*, 255, 1–77.
- Gallão, J. E., & Bichuette, M. E. (2016). On the enigmatic troglobitic scorpion *Troglophopalus translucidus*: Distribution, description of adult females, life history and comments on *Rhopalurus lacrau* (Scorpiones: Buthidae). *Zoologia (Curitiba)*, 33, e20150193.
- Gantenbein, B., Kropf, C., Largiader, C. R., Scholl, A., & others. (2000). Molecular and morphological evidence for the presence of a new buthid taxon (Scorpiones: Buthidae) on the island of Cyprus. *Revue Suisse de Zoologie*, 107(1), 213.
- Goodman, A. M., Prendini, L., Francke, O. F., & Esposito, L. A. (2021). Systematic revision of the arboreal Neotropical “thorellii” clade of *Centruroides* Marx, 1890, bark scorpions (Buthidae CL Koch, 1837) with descriptions of six new species. *Bulletin of the American Museum of Natural History*, 452(1), 1–92.
- Heddergott, M., Stubbe, M., Stubbe, W., Steinbach, P., & Stubbe, A. (2016). Geographical distribution of the genus *Mesobuthus* (Scorpiones: Buthidae) in Mongolia. *Erforschung Biologischer Ressourcen Der Mongolei*, 13, 147–164.
- Khalil, N., & Yağmur, E. A. (2010). *Leiurus abdullahbayrami* (Scorpiones: Buthidae), a new species for the scorpion fauna of Syria. *Serket*, 12(1), 1–6.
- Kovařík, F. (1997). Revision of the genera *Lychas* and *Hemilychas*, with descriptions of six new species (Scorpiones: Buthidae). *Acta Societatis Zoologicae Bohemicae*, 61, 311–371.



- Kovařík, F. (2006). Review of Tunisian species of the genus *Buthus* with descriptions of two new species and a discussion of Ehrenberg's types (Scorpiones: Buthidae). *Euscorpius*, 2006(34), 1–16.
- Kovařík, F. (2011). *Buthus awashensis* sp. N. From Ethiopia (Scorpiones: Buthidae). *Euscorpius*, 2011(128), 1–6.
- Kovařík, F., Fet, V., Gantenbein, B., Graham, M. R., Yağmur, E. A., Št'áhlavský, F., Poverennyi, N. M., & Novruzov, N. E. (2022). A revision of the genus *Mesobuthus* Vachon, 1950, with a description of 14 new species (Scorpiones: Buthidae). *Euscorpius*, 348.
- Kovařík, F., & Lowe, G. (2012). Review of the genus *Neobuthus* Hirst, 1911 with description of a new species from Ethiopia (Scorpiones: Buthidae). *Euscorpius*, 2012(138), 1–25.
- Kovařík, F., & Lowe, G. (2019). Scorpions of the Horn of Africa (Arachnida, Scorpiones). Part XVIII. *Gint banfasae* sp. N. From Somaliland (Buthidae). *Euscorpius*, 2019(272), 1–14. <https://doi.org/10.18590/euscorpius.2019.vol2019.iss272.1>
- Kovařík, F., Lowe, G., Just, P., Ibrahim Awale, A., Sh Abdirahman Elmi, H., & Št'áhlavský, F. (2018). Scorpions of the Horn of Africa (Arachnida: Scorpiones). Part XV. Review of the genus *Gint* Kovařík et al., 2013, with description of three new species from Somaliland (Scorpiones, Buthidae). *Euscorpius*, 2018(259), 1–41.
- Kovařík, F., Lowe, G., Plíšková, J., & Št'áhlavský, F. (2013). A new scorpion genus, *Gint* gen. N., from the Horn of Africa (Scorpiones: Buthidae). *Euscorpius*, 173, 1–19.
- Kovařík, F., Lowe, G., Plíšková, J., & Št'áhlavský, F. (2016a). Scorpions of the Horn of Africa (Arachnida: Scorpiones). Part VI. *Compsobuthus* Vachon, 1949 (Buthidae), with a description of *C. eritreensis* sp. N. *Euscorpius*, 2016(226), 1–21.
- Kovařík, F., Lowe, G., Plíšková, J., & Št'áhlavský, F. (2016b). Scorpions of the Horn of Africa (Arachnida: Scorpiones). Part VII. *Parabuthus* Pocock, 1890 (Buthidae), with description of *P. hamar* sp. N. And *P. kajibu* sp. N. From Ethiopia. *Euscorpius*, 228, 1–58.
- Kovařík, F., Lowe, G., Ranawana, K. B., Hoferek, D., Jayarathne, V. S., Plíšková, J., & Št'áhlavský, F. (2016). Scorpions of Sri Lanka (Arachnida, Scorpiones: Buthidae, Chaerilidae, Scorpionidae) with description of four new species of the genera *Charmus* Karsch, 1879 and *Reddyanus* Vachon, 1972 stat. N. *Euscorpius*, 220, 1–133.
- Kovařík, F., Lowe, G., Seiter, M., Plíšková, J., & Št'áhlavský, F. (2015). Scorpions of Ethiopia (Arachnida: Scorpiones). Part II. Genus *Babycurus* Karsch, 1886 (Buthidae), with description of two new species. *Euscorpius*, 196, 1–31.
- Kovařík, F., Lowe, G., & Št'áhlavský, F. (2016). Review of northwestern African *Buthacus*, with description of *Buthacus stockmanni* sp. N. From Morocco and Western Sahara (Scorpiones, Buthidae). *Euscorpius*, 236, 1–18.
- Kovařík, F., Lowe, G., & Št'áhlavský, F. (2018). Review of the genus *Babycurus* Karsch, 1886 (Arachnida, Scorpiones, Buthidae), with descriptions of *Barbaracurus* gen. N. And two new species from Oman and Yemen. *Euscorpius*, 2018(267), 1–41.
- Kovařík, F., Lowe, G., Stockmann, M., & Št'áhlavský, F. (2020). Notes on *Compsobuthus* Vachon, 1949: Redescription of *C. arabicus* Levy et al., 1973 from Arabia, and description of two new species from North Africa (Scorpiones: Buthidae). *Euscorpius*, 2020(298), 1–40.
- Kovařík, F., & Mazuch, T. (2015). Review of the genus *Gint* Kovařík et al., 2013, with description of two new species from Somaliland and Somalia (Puntland) (Scorpiones: Buthidae). *Euscorpius*, 209, 1–23.
- Kovařík, F., Teruel, R., & Lowe, G. (2016). Two new scorpions of the genus *Chaneke* Francke, Teruel et Santibáñez-López, 2014 (Scorpiones: Buthidae) from southern Mexico. *Euscorpius*, 2016(218), 1–20.
- Kovařík, F., Teruel, R., Lowe, G., & Friedrich, S. (2015). Four new scorpion species (Scorpiones: Buthidae) from Amazonian Peru. *Euscorpius*, 210, 1–40.

- Lenarducci, Â. R. I., Pinto-da-Rocha, R., & Lucas, S. M. (2005). Descrição de uma nova espécie de *Rhopalurus thorell*, 1876 (scorpiones: Buthidae) do Nordeste Brasileiro. *Biota Neotropica*, 5, 173–180.
- Lira, A. F., Foerster, S. I. A., Albuquerque, C. M., & Moura, G. J. (2021). Contrasting patterns at interspecific and intraspecific levels in scorpion body size across a climatic gradient from rainforest to dryland vegetation. *Zoology*, 146, 125908.
- Lourenço, W. R. (1979). Le scorpion Buthidae: *Tityus mattogrossensis* Borelli, 1901. (Morphologie, écologie, biologie et développement postembryonnaire). *Bulletin Du Museum National d'Histoire Naturelle*, 4(1), 95–117.
- Lourenço, W. R. (1982). Revision du genre *Ananteris* Thorell, 1891 (Scorpiones, Buthidae), et description de six especes nouvelles. *Bulletin Du Museum National d'Histoire Naturelle. Section A. Zoologie, Biologie et Ecologie Animales*, 4(1).
- Lourenço, W. R. (1983). Contribution a la connaissance de *Centruroides barbudensis* (Pocock 1898) (Scorpiones, Buthidae). *Journal of Arachnology*, 327–335.
- Lourenço, W. R. (2003). Compléments à la faune de scorpions (Arachnida) de l'Afrique du Nord, avec des considérations sur le genre *Buthus* Leach, 1815. *Revue Suisse de Zoologie*, 110(4), 875–912.
- Lourenço, W. R. (2008). The geographic pattern of distribution of the genus *Rhopalurus* Thorell, 1876 in the Guayana-Amazon region (Scorpiones: Buthidae). *Euscorpius*, 2008(73), 1–14.
- Lourenço, W. R. (2012a). Further considerations on *Tityus* (*Archaeotityus*) *clathratus* CL Koch, 1844 and description of two associated new species (Scorpiones: Buthidae). *Boletín de La Sociedad Entomológica Aragonesa (S.E.A.)*, 50, 277–283.
- Lourenço, W. R. (2012b). Further taxonomic considerations on the genus *buthoscorpio* Werner, 1936 (Scorpiones, Buthidae), with description of a new species from India. *Boletín de La Sociedad Entomológica Aragonesa (S.E.A.)*, 50, 187–192.
- Lourenço, W. R. (2012c). The genus *Ananteris* thorell, 1891 (scorpiones, buthidae) in the Northeast region of Brazil and description of a new species. *Boletín de La Sociedad Entomológica Aragonesa (S.E.A.)*, 50, 73–76.
- Lourenço, W. R. (2014). The genus *Rhopalurus* Thorell, 1876 (Scorpiones: Buthidae) in northeast Brazil; a possible case of a vicariant species. *Acta Biológica Paranaense (Curitiba)*, 43(1–2), 69–76.
- Lourenço, W. R. (2020). A possible relict population of *Mesobuthus* (*Aegaeobuthus*?) *nigrocinctus* (Ehrenberg, 1828) in the Bishri Mountains of Syria (Scorpiones: Buthidae). *Serket*, 17(2).
- Lourenço, W. R. (2021). Some additional comments on the *Ananterinae* or *Ananteris* group and description of a new species of *Ananteris* Thorell, 1891 from Central Brazil (Scorpiones: Buthidae). *Zootaxa*, 4984(1), 347–356.
- Lourenço, W. R., Baptista, R. L. C., & Giupponi, A. P. L. (2004). Troglobitic scorpions: A new genus and species from Brazil. *Comptes Rendus Biologies*, 327(12), 1151–1156.
- Lourenço, W. R., Giupponi, A. P., & Leguin, E.-A. (2013). Description of three more new species of the genus *Ananteris*. *Anais Da Academia Brasileira de Ciências*, 85, 709–725.
- Lourenço, W. R., Jesus-Junior, M., & Limeira-de-Oliveira, F. (2006). A new species of *Tityus* CL Koch, 1836 (Scorpiones, Buthidae) from the state of Maranhão in Brazil. *Boletín de La Sociedad Entomológica Aragonesa (S.E.A.)*, 38(1), 117–120.
- Lourenço, W. R., & Leguin, E.-A. (2008). The true identity of *Scorpio* (*Atreus*) *obscurus* Gervais, 1843 (Scorpiones, Buthidae). *Euscorpius*, 2008(75), 1–9.
- Lourenço, W. R., Modry, D., & Amr, Z. (2002). Description of a new species of *Leirus* Ehrenberg, 1828 (Scorpiones, Buthidae) from the south of Jordan. *Revue Suisse de Zoologie*, 109(3), 635–642.

- Lourenço, W. R., & Pinto-Da-Rocha, R. (1997). A reappraisal of the geographic distribution of the genus *Rhopalurus* Thorell (Scorpiones, Buthidae) and description of two new species. *Biogeographica*, 73(4), 181–191.
- Lourenço, W. R., & Sadine, S. E. (2021). The genus *Orthochirus* Karsch, 1891, in Algeria with description of a new species (Scorpiones, Buthidae). *Bulletin de La Société Entomologique de France*, 126(2), 175–181.
- Lourenço, W. R., & Vachon, M. (2004). Considérations sur le genre *Buthus* Leach, 1815 en Espagne, et description de deux nouvelles espèces (Scorpiones, Buthidae). *Revista Ibérica de Aracnología*, 9, 81–94.
- Lourenço, W. R., & von Eickstedt, V. R. D. (1984). Descrição de uma espécie nova de *Tityus* coletada no Estado da Bahia, Brasil (Scorpiones, Buthidae). *Journal of Arachnology*, 55–60.
- Lourenço, W. R., & von Eickstedt, V. R. D. (1988). Sinopse das espécies de *Tityus* do Nordeste do Brasil, com a redescricao da *T. neglectus* Mello-Leitão (Scorpiones, Buthidae). *Revista Brasileira de Zoologia*, 5, 399–408.
- Lourenço, W. R., & Ythier, E. (2013). The remarkable scorpion diversity in the Ecuadorian Andes and description of a new species of *Tityus* CL Koch, 1836 (Scorpiones, Buthidae). *ZooKeys*, 307, 1.
- Lourenço, W. R., & Ythier, E. (2017). Description of *Tityus* (*Atreus*) *cisandinus* sp. N. From Ecuadorian Amazonia, with comments on some related species (Scorpiones: Buthidae). *Arachnida-Rivista Aracnologica Italiana*, 15, 18–34.
- Lourenço, W. R., Ythier, E., & Leguin, E.-A. (2009). A new species of *Androctonus* Ehrenberg, 1828 from Morocco (Scorpiones: Buthidae). *Euscorpius*, 2009(89), 1–8.
- Lourenço, W., & Silva, E. (2007). New evidence for a disrupted distribution pattern of the *Tityus* confluens complex, with the description of a new species from the State of Para, Brazil (Scorpiones, Buthidae). *Amazoniana*, 19(3/4), 77–86.
- Lowe, G. (2024). Pers. Comm.
- Lowe, G. (2010a). A new species of *Odontobuthus* (Scorpiones: Buthidae) from northern Oman. *Euscorpius*, 2010(96), 1–22.
- Lowe, G. (2010b). New picobuthoid scorpions (Scorpiones: Buthidae) from Oman. *Euscorpius*, 2010(93), 1–53.
- Lowe, G. (2010c). The genus *Vachoniolus* (Scorpiones: Buthidae) in Oman. *Euscorpius*, 2010(100), 1–37.
- Lowe, G. (2018a). The genera *Butheolus* Simon, 1882 and *Xenobuthus* gen. Nov. (Scorpiones: Buthidae) in Oman. *Euscorpius*, 261, 1–73.
- Lowe, G. (2018b). The genera *Butheolus* Simon, 1882 and *Xenobuthus* gen. Nov. (Scorpiones: Buthidae) in Oman. *Euscorpius*, 261, 1–73.
- Lowe, G., & Kovařík, F. (2016). Scorpions of the Horn of Africa (Arachnida, Scorpiones). Part V. Two new species of *Neobuthus* Hirst, 1911 (Buthidae), from Ethiopia and Eritrea. *Euscorpius*, 224, 1–46.
- Lowe, G., Kovařík, F., Stockmann, M., & Št'áhlavský, F. (2018). Review of *Microbuthus* with Description of *M. satyrus* sp. N. (Scorpiones, Buthidae) from Oman and Yemen. *Euscorpius*, 2018(263), 1–22.
- Lowe, G., Kovařík, F., Stockmann, M., & Št'áhlavský, F. (2019). *Trypanothacus* gen. N., a new genus of burrowing scorpion from the Arabian Peninsula (Scorpiones: Buthidae). *Euscorpius*, 2019(277), 1–30.
- Martín-Frías, E., de Armas, L. F., & Paniagua-Solís, J. F. (2005). Redescription of the Mexican scorpion *Centruroides hoffmanni* Armas, 1996 (Scorpiones: Buthidae). *Euscorpius*, 2005(22), 1–7.
- Miranda, R. J., Bermúdez, S., Flórez, E., & Armas, L. F. (2020). A new species of *tityus* from panama and costa rica previously identified as *tityus pachyurus* pocock, 1897 (scorpiones: Buthidae). *Revista Ibérica de Aracnología*, 37, 197–204.
- Montoya, M., & Armas, L. F. (2002). Escorpiones (Arachnida) del Archipiélago de Bocas del Toro, Panamá. *Revista de Biología Tropical*, 50(1), 155–160.

- Moreno-González, J. A., Pinto-da-Rocha, R., & Gallão, J. E. (2021). Bringing order to a complex system: Phenotypic and genotypic evidence contribute to the taxonomy of *Tityus* (Scorpiones, Buthidae) and support the description of a new species. *ZooKeys*, 1075, 33.
- Obuid-Allah, A. H., El-Shimy, N. A., Mahbob, M. A., Ali, R. S., & others. (2020). Survey and morphological studies on scorpions inhabiting New Valley Governorate, Egypt. *Egyptian Academic Journal of Biological Sciences, B. Zoology*, 12(2), 227–238.
- Ojanguren Affilastro, A., Kochalka, J., Guerrero-Orellana, D., Garcete-Barrett, B., De Roodt, A., Borges, A., & Ceccarelli, F. S. (2021). Redefinition of the identity and phylogenetic position of *Tityus trivittatus* Kraepelin 1898, and description of *Tityus carrilloi* n. Sp. (Scorpiones; Buthidae), the most medically important scorpion of southern South America. *Revista Del Museo Argentino de Ciencias Naturales*, 23, 27–55. <https://doi.org/10.22179/REVMACN.23.714>
- Ojanguren-Affilastro, A. A. (2005). Estudio monográfico de los escorpiones de la República Argentina. *Revista Ibérica de Aracnología*, 11, 75–241.
- Ojanguren-Affilastro, A. A., Adilardi, R. S., Cajade, R., Ramirez, M. J., Ceccarelli, F. S., & Mola, L. M. (2017). Multiple approaches to understanding the taxonomic status of an enigmatic new scorpion species of the genus *Tityus* (Buthidae) from the biogeographic island of Paraje Tres Cerros (Argentina). *PLoS One*, 12(7), e0181337.
- Ozkan, O., Adiguzel, S., & Kar, S. (2006). Parametric values of *Androctonus crassicauda* (Oliver, 1807) (Scorpiones: Buthidae) from Turkey. *Journal of Venomous Animals and Toxins Including Tropical Diseases*, 12, 549–559.
- Ponce Saavedra, J., & Francke, O. F. (2004). Una nueva especie de alacrán del género *Centruroides* Marx (1890) (Scorpionbes, Buthidae) de la depresión del Balsas, México. *Acta Zoológica Mexicana*, 20(2), 221–232.
- Ponce-Saavedra, J., Quijano-Ravell, A. F., Teruel, R., & Francke, O. F. (2015). Redescription of *Centruroides ornatus* Pocock, 1902 (Scorpiones Buthidae), a montane scorpion from central Mexico. *Revista Ibérica de Aracnología*, 15, 81–89.
- Prendini, L. (2001). Further additions to the scorpion fauna of Trinidad and Tobago. *The Journal of Arachnology*, 29(2), 173–188.
- Prendini, L., Esposito, L. A., Huff, J. C., & Volschenk, E. S. (2009). Redescription of *Rhopalurus abudi* (Scorpiones, Buthidae), with first description of the male and first record from mainland Hispaniola. *The Journal of Arachnology*, 37(2), 206–224.
- Qi, J.-X., Zhu, M.-S., & Lourenço, W. R. (2004). Redescription of *mesobuthus martensii martensii* (karsch, 1879)(scorpiones: Buthidae) from China. *Revista Ibérica de Aracnología*, 10, 137–144.
- Rojas-Runjaic, F. J. M., & Armas, L. F. (2007). Dos nuevas especies venezolanas del grupo *Tityus clathratus* y notas sobre *Tityus ramirezi* Esquivel de Verde, 1968 (Scorpiones: Buthidae). *Boletín de La Sociedad Entomológica Aragonesa (S.E.A.)*, 41, 53–66.
- Seiter, M., & Turiel, C. (2013). First record of *Androctonus australis* (Linnaeus, 1758) from Jordan (Scorpiones: Buthidae). *Revista Ibérica de Aracnología*, 23, 95–98.
- Sissom, W. D. (1995). Redescription of the scorpion *Centruroides thorelli* Kraepelin (Buthidae) and description of two new species. *Journal of Arachnology*, 91–99.
- Sissom, W. D., & Francke, O. F. (1983). Redescription of *Centruroides testaceus* (DeGeer) and description of a new species from the Lesser Antilles (Scorpiones: Buthidae). *Occasional Papers Museum Texas Tech University*, 88, 1–14.
- Sissom, W. D., & Lourenço, W. R. (1987). The genus *Centruroides* in South America (Scorpiones, Buthidae). *Journal of Arachnology*, 11–28.
- Stockmann, M., Turiel, C., Althoff, F., Lowe, G., & Kovařík, F. (2016). First report of *Lissothus occidentalis* Vachon, 1950 (Scorpiones: Buthidae) from Morocco and Western Sahara, with notes on ecology and captive breeding. *Euscorpius*, 2016(235), 1–12.

- Sun, D., & Sun, Z.-N. (2011). Notes on the genus *Mesobuthus* (Scorpiones: Buthidae) in China, with description of a new species. *The Journal of Arachnology*, 39(1), 59–75.
- Teruel, R. (2000). Taxonomía del complejo *Centruroides anchorellus* Armas, 1976 (Scorpiones: Buthidae). *Revista Ibérica de Aracnología*, 1, 3–12.
- Teruel, R. (2001). Redescipción de *Alayotityus delacruzi* Armas, 1973 (Scorpiones: Buthidae). *Revista Ibérica de Aracnología*, 3, 17–24.
- Teruel, R. (2011). Redescription of *Tityus pictus* Pocock, 1893 and *Tityus smithii* Pocock, 1893, with notes on the *Tityus* species from the Lesser Antilles (Scorpiones: Buthidae). *Euscorpius*, 2011(125), 1–26.
- Teruel, R., & Armas, L. F. (2006). Revisión del grupo “*Tityus crassimanus*” (Scorpiones: Buthidae). *Boletín Sociedad Entomológica Aragonesa*, 1(39), 139–149.
- Teruel, R., & Armas, L. F. (2012). Redescipción de *Rhopalurus junceus* (Herbst 1800)(Scorpiones: Buthidae). *Boletín de La Sociedad Entomológica Aragonesa (S.E.A.)*, 50, 153–174.
- Teruel, R., & Cozijn, M. A. (2013). On the distribution of the genus *Rhopalurus* Thorell, 1876 (Scorpiones: Buthidae) in the southern Caribbean islands. *Euscorpius*, 2013(179), 1–7.
- Teruel, R., de Armas, L. F., & Kovařík, F. (2015). A new species of *Centruroides* Marx, 1890 (Scorpiones: Buthidae) from southern Hispaniola, Greater Antilles. *Euscorpius*, 198, 1–18.
- Teruel, R., & Kovařík, F. (2011). Redescription and taxonomic position of *Tityus atriventer* Pocock, 1897 (Scorpiones: Buthidae). *Euscorpius*, 2011(115), 1–9.
- Teruel, R., & Kovařík, F. (2014). Redescription of *Androctonus bicolor* Ehrenberg, 1828, and Description of *Androctonus turieli* sp. N. From Tunisia (Scorpiones: Buthidae). *Euscorpius*, 186, 1–15.
- Teruel, R., Kovařík, F., Lowe, G., & Friedrich, S. (2017). Complements to the taxonomy of some Amazonian scorpions (Scorpiones: Buthidae). *Euscorpius*, 245, 1–7.
- Teruel, R., Ponce-Saavedra, J., & Quijano-Ravell, A. F. (2015). Redescription of *Centruroides noxius* and description of a closely related new species from western Mexico (Scorpiones: Buthidae). *Revista Mexicana de Biodiversidad*, 86(4), 896–911.
- Teruel, R., & Rein, J. O. (2010). A new *Hottentotta* Birula, 1908 from Afghanistan, with a note on the generic position of *Mesobuthus songi* Lourenço, Qi et Zhu, 2005 (Scorpiones: Buthidae). *Euscorpius*, 2010(94), 1–8.
- Teruel, R., & Roncallo, C. A. (2008). Rare or poorly known scorpions from Colombia. III. On the taxonomy and distribution of *Rhopalurus laticauda* Thorell, 1876 (Scorpiones: Buthidae), with description of a new species of the genus. *Euscorpius*, 2008(68), 1–12.
- Teruel, R., & Stockwell, S. A. (2002). A revision of the scorpion fauna of Honduras, with the description of a new species (Scorpiones: Buthidae, Diplocentridae). *Revista Ibérica de Aracnología*, 6, 111–127.
- Teruel, R., & Tietz, A. K. (2008). The true identity of *Rhopalurus pintoii* Mello-Leitão, 1932, with notes on the status and distribution of *Rhopalurus crassicauda* Caporiacco, 1947 (Scorpiones: Buthidae). *Euscorpius*, 2008(70), 1–14.
- Turiel, C. (2014). A new species of *Hottentotta* Birula, 1908 (Scorpiones: Buthidae) from southern Morocco. *Euscorpius*, 2014(181), 1–9.
- Vachon, M. (1952). *Etudes sur les Scorpions*. Institut Pasteur d’Algérie.
- Viquez, C., & Armas, L. F. (2005). Primeros registros de *Centruroides exilimanus* Teruel & Stockwell, 2001 (Scorpiones: Buthidae) para Guatemala y El Salvador, con la descripción de la hembra adulta. *Boletín de La Sociedad Entomológica Aragonesa (S.E.A.)*, 1(37), 169–170.
- Ythier, E. (2023). A new species of *Buthus* Leach, 1815 from the Atlantic coast of Morocco (Scorpiones: Buthidae). *Faunitaxys*, 11(69), 1–7.
- Ythier, E., & Lourenço, W. R. (2022). A new species of *Androctonus* Ehrenberg, 1828 from Western Sahara (Scorpiones: Buthidae). *Serket*, 18(3).

## ModelFinder results

Best-fit DNA partition scheme obtained with ModelFinder and employed in IQ-TREE for estimating tree topology and branch lengths. PI = number of parsimony-informative sites, IS = number of invariant sites.

| Partition        | Number of taxa | Length (bp) | PI  | IS   | Model    |
|------------------|----------------|-------------|-----|------|----------|
| 18S rRNA         | 154            | 1752        | 115 | 1554 | TNe+G4   |
| 28S rRNA         | 196            | 235         | 50  | 171  | TNe+G4   |
| 16S rRNA (mtDNA) | 234            | 265         | 169 | 79   | GTR+F+G4 |
| COI 1st position | 253            | 195         | 75  | 110  | TN+F+G4  |
| COI 2nd position | 253            | 195         | 24  | 146  | GTR+F+G4 |
| COI 3rd position | 253            | 194         | 191 | 1    | GTR+F+G4 |

## Calibration points

Calibration points used for node age estimation in buthid scorpions are detailed below. Each label corresponds to a calibration point, as shown on the phylogeny illustrated on the following page. Minimum and maximum node ages were applied to convert the maximum likelihood tree, generated using IQ-TREE v.2.3.2, into an ultrametric tree through penalized maximum likelihood. Node ages in the resulting ultrametric tree were then estimated using Bayesian inference in BEAST v1.10.4, employing lognormal priors. The 2.5% and 97.5% quantiles (Qs) of these priors aligned with the minimum and maximum ages for each calibration point.

| Label | Split                                                  | Node age (My) |       |                                  | Prior specification |       |               |
|-------|--------------------------------------------------------|---------------|-------|----------------------------------|---------------------|-------|---------------|
|       |                                                        | Min.          | Max.  | Source                           | meanlog             | sdlog | 2.5%-97.5% Qs |
| a     | Buthus group                                           | 44.00         | 53.29 | Ojanguren-Affilastro et al. 2017 | 3.88                | 0.049 | 44.07-53.46   |
| b     | Ananteris sp./A. balzanii                              | 2.12          | 7.20  | Ojanguren-Affilastro et al. 2017 | 1.36                | 0.310 | 2.14-7.4      |
| c     | Greater Antilles clade of Centruroides (fossil record) | 17.00         | 20.00 | Esposito and Prendini 2019       | 2.91                | 0.040 | 17.02-20.06   |
| d     | Greater Antilles/Chortis Maya clade of Centruroides    | 23.00         | 26.00 | Esposito and Prendini 2019       | 3.20                | 0.030 | 23.02-26.06   |
| e     | Chortis Maya clade of Centruroides (fossil record)     | 15.00         | 23.00 | Esposito and Prendini 2019       | 2.92                | 0.110 | 15.06-23.17   |
| f     | Centruroides/Heteroctenus                              | 26.00         | 30.00 | Esposito and Prendini 2019       | 3.33                | 0.040 | 26.03-30.07   |
| g     | Tityus group                                           | 26.04         | 42.17 | Ojanguren-Affilastro et al. 2017 | 3.50                | 0.120 | 26.15-42.52   |
| h     | Tityus (Archeotityus) group                            | 7.16          | 15.89 | Ojanguren-Affilastro et al. 2017 | 2.37                | 0.200 | 7.21-16.11    |
| i     | Zabius spp.                                            | 3.29          | 7.38  | Ojanguren-Affilastro et al. 2017 | 1.60                | 0.210 | 3.31-7.48     |







## R Function for defining lognormal priors

The `get_lognormal` R function is designed to define lognormal priors for node age estimation in BEAST. It performs parameter optimization using the L-BFGS-B protocol to find the `meanlog` ( $\mu$ ) and `sdlog` ( $\sigma$ ) parameters of a lognormal distribution, ensuring that the 2.5% and 97.5% quantiles align with the target quantiles – i.e., the prior belief about the respective node age. The objective function within `get_lognormal` aims to minimize the squared difference between the target quantiles and the actual quantiles for the given `meanlog` and `sdlog` values. It is defined as:

$$f(\mu, \sigma) = \sum_{i=1}^n (Q(p_i; \mu, \sigma) - T_i)^2$$

where:

- $f(\mu, \sigma)$  is the objective function,
- $Q(p_i; \mu, \sigma) = \exp(\mu + \sigma \cdot \Phi^{-1}(p_i))$  is the lognormal quantile function,
- $\mu$  is the `meanlog` (logarithmic mean of the distribution),
- $\sigma$  is the `sdlog` (logarithmic standard deviation),
- $p_i$  are the quantile probabilities (e.g., 0.025 and 0.975),
- $T_i$  are the target quantiles (see the example below),
- $\Phi^{-1}(p)$  is the inverse of the CDF of the standard normal distribution.

### Instructions

Simply copy the code provided on the next page and paste it into your R console. Press Enter, and you will see the `get_lognormal` function appear in your Environment panel (assuming you are using RStudio).

```

# Function to find optimal values for meanlog and sdlog

get_lognormal <- function(target_quantiles, quantile_probs, seed_number) {

  # Define the objective function
  objective_function <- function(params) {
    meanlog <- params[1]
    sdlog <- params[2]

    # Calculate the actual quantiles for the given meanlog and sdlog
    actual_quantiles <- qlnorm(quantile_probs, meanlog, sdlog)

    # Calculate the sum of squared differences between target and actual quantiles
    sum((actual_quantiles - target_quantiles)^2)
  }

  # Set initial guesses for meanlog and sdlog
  initial_guess <- c(log((target_quantiles[1] + target_quantiles[2]) / 2), 0.5)

  # Use optim to find the best meanlog and sdlog
  result <- optim(initial_guess,
    objective_function,
    method = "L-BFGS-B",
    lower = c(-Inf, 0.01),
    upper = c(Inf, Inf)
  )

  # Extract the optimal meanlog and sdlog
  optimal_meanlog <- result$par[1]
  optimal_sdlog <- result$par[2]

  # Generate samples using the optimal parameters
  set.seed(seed_number)
  n_samples <- 1000
  samples <- rlnorm(n_samples, optimal_meanlog, optimal_sdlog)

  # Return the results

  return(
    cat(
      "Optimal meanlog:", round(optimal_meanlog, 3), "\n",
      "Optimal sdlog:", round(optimal_sdlog, 3), "\n",
      "Quantiles of 1000 simulated values:",
      round(quantile(samples, probs = quantile_probs), 3)
    )
  )
}

```

## Usage

Let's say we have a fossil record for a specific node in our phylogeny, with an estimated age between 12 and 16 million years. We want to set a lognormal prior for this node so that the 2.5% and 97.5% quantiles of the lognormal distribution approximate this age range. In other words, we aim for the referred quantiles to be as close as possible to 12 and 16 million years. To achieve this, we will use the `get_lognormal` function to determine the `meanlog` and `sdlog` parameters of the lognormal distribution. The main arguments in the `get_lognormal` function are `target_quantiles`, which should include the minimum and maximum ages from our fossil record (12 and 16 million years in this case), and `quantile_probs`, which represent the quantiles of the lognormal distribution that should correspond to the values provided in `target_quantiles`. We also need to provide a seed number to ensure reproducibility (it can be any number). Thus, all we need to do is the following:

```
get_lognormal(  
  target_quantiles = c(12, 16),  
  quantile_probs = c(0.025, 0.975),  
  seed_number = 10  
)
```

```
## Optimal meanlog: 2.629  
## Optimal sdlog: 0.073  
## Quantiles of 1000 simulated values: 12.03 16.079
```

The function returns the optimal values for `meanlog` (2.629) and `sdlog` (0.073) for a lognormal distribution, ensuring that the 2.5% and 97.5% quantiles closely match the values provided via `target_quantiles`. We can generate and plot a lognormal distribution using the optimal `meanlog` and `sdlog`:

```
a <- rlnorm(n = 1000, meanlog = 2.629, sdlog = 0.073)  
plot(density(a), main = NA, las = 1)  
abline(v = 12, col = "red")  
abline(v = 16, col = "red")  
abline(v = 12.03, col = "blue", lty = "dashed")  
abline(v = 16.079, col = "blue", lty = "dashed")  
legend("topright",  
  legend = c("Actual", "Estimated\nquantiles"),  
  col = c("red", "blue"),  
  lty = c("solid", "dashed"),  
  bty = "n", cex = 0.8,  
  y.intersp = 2.5  
)
```

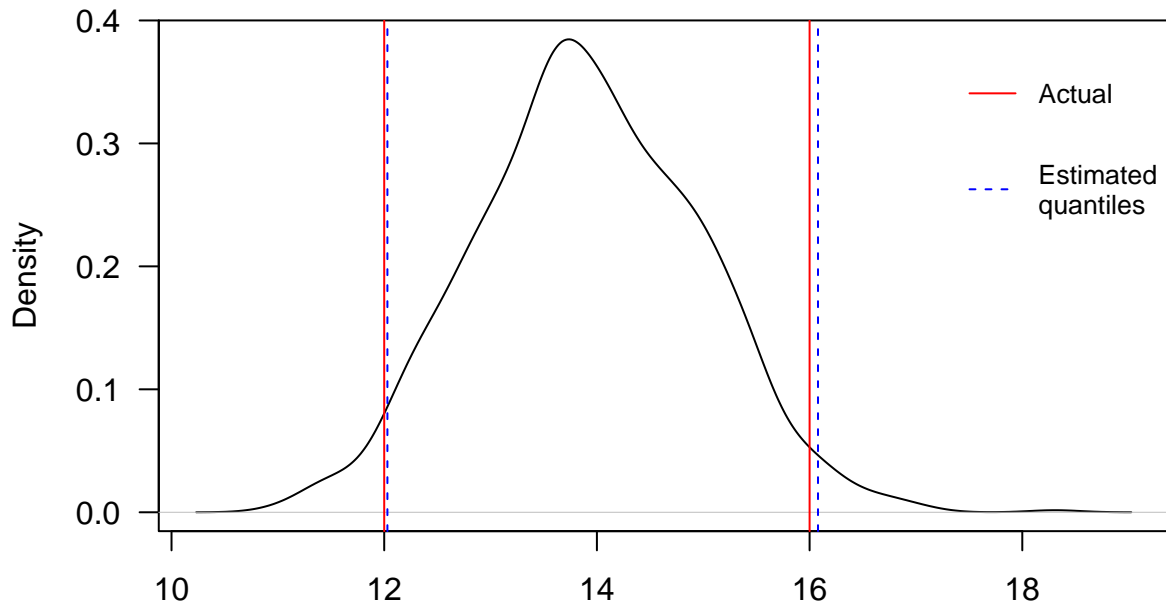

N = 1000 Bandwidth = 0.2391

## Interaction models

### Context

This is a set of complementary analyses designed to test for sex-specific differences in the slope parameters of linear measurements used to predict total length and carapace length in buthid scorpions. To assess these differences, an interaction term between sex and each predictor was added to the models. The regression models were built using a Bayesian framework with the R package `MCMCglmm` (Hadfield 2010) accounting for the phylogenetic relationships among species. In essence, these are phylogenetic mixed linear models fitted for trait data with repeated measures (i.e., the species), which were used as the random factor in the analyses. The dataset included natural logarithm values of linear measurements from 195 species. Abbreviations for the traits are provided in the table below.

Trait abbreviation:

| Trait                         | Abbreviation |
|-------------------------------|--------------|
| Total length                  | ToL          |
| Carapace length               | CarL         |
| Chela length                  | CheL         |
| Chela width                   | CheW         |
| Length of metasomal segment V | Met5L        |
| Width of metasomal segment V  | Met5W        |
| Telson length                 | TeL          |
| Telson width                  | TeW          |

### Interactions with sex were not statistically significant when predicting total length

The table below presents the interaction terms between sex and each predictor, using total length as the response variable. The models were specified with species included as a random factor to account for repeated measures (i.e., one measurement per sex). All analyses considered the phylogenetic dependence of trait values (see the main text for further details). ESS = effective sample size.

| Model | Parameter  | Posterior Mean | Lower 95% CI | Upper 95% CI | ESS  |
|-------|------------|----------------|--------------|--------------|------|
| M1    | Intercept  | 2.1067         | 1.9907       | 2.2011       | 1000 |
|       | carL       | 1.0333         | 0.9881       | 1.0772       | 900  |
|       | sexm       | 0.0367         | -0.0295      | 0.1062       | 816  |
|       | carL:sexm  | 0.0149         | -0.0247      | 0.0520       | 863  |
| M2    | Intercept  | 2.3406         | 2.1305       | 2.5767       | 900  |
|       | cheL       | 0.6968         | 0.6367       | 0.7581       | 999  |
|       | sexm       | -0.0847        | -0.1700      | 0.0055       | 900  |
|       | cheL:sexm  | 0.0326         | -0.0060      | 0.0728       | 900  |
| M3    | Intercept  | 3.4082         | 3.2306       | 3.5734       | 836  |
|       | cheW       | 0.6405         | 0.5808       | 0.7105       | 900  |
|       | sexm       | -0.0148        | -0.0531      | 0.0245       | 900  |
|       | cheW:sexm  | -0.0204        | -0.0626      | 0.0254       | 900  |
| M4    | Intercept  | 2.1614         | 2.0517       | 2.2747       | 900  |
|       | met5L      | 0.9480         | 0.9016       | 0.9922       | 900  |
|       | sexm       | -0.0424        | -0.1040      | 0.0241       | 900  |
|       | met5L:sexm | -0.0158        | -0.0481      | 0.0214       | 900  |
| M5    | Intercept  | 3.1300         | 2.9011       | 3.3314       | 900  |
|       | met5W      | 0.7158         | 0.6437       | 0.7938       | 1002 |
|       | sexm       | 0.0097         | -0.0448      | 0.0677       | 900  |
|       | met5W:sexm | -0.0206        | -0.0746      | 0.0258       | 900  |
| M6    | Intercept  | 2.3378         | 2.2198       | 2.4567       | 940  |
|       | teL        | 0.8932         | 0.8516       | 0.9409       | 900  |
|       | sexm       | -0.0261        | -0.0847      | 0.0336       | 900  |
|       | teL:sexm   | 0.0166         | -0.0192      | 0.0507       | 900  |
| M7    | Intercept  | 3.2794         | 3.1353       | 3.4318       | 992  |
|       | teW        | 0.8140         | 0.7608       | 0.8611       | 900  |
|       | sexm       | 0.0005         | -0.0300      | 0.0275       | 900  |
|       | teW:sexm   | 0.0279         | -0.0041      | 0.0646       | 900  |

### Interactions with sex were mostly non significant when predicting carapace length

The table below presents the interaction terms between sex and each predictor, using carapace length as the response variable. The models were specified with species included as a random factor to account for repeated measures (i.e., one measurement per sex). All analyses considered the phylogenetic dependence of trait values (see the main text for further details). Only the interaction with metasomal segment V (`ln_met5L:sexm`) was statistically significant. ESS = effective sample size.

| Model | Parameter  | Posterior Mean | Lower 95% CI | Upper 95% CI | ESS  |
|-------|------------|----------------|--------------|--------------|------|
| M1    | Intercept  | 0.4280         | 0.1693       | 0.6841       | 996  |
|       | cheL       | 0.5755         | 0.5257       | 0.6271       | 950  |
|       | sexm       | -0.1089        | -0.1644      | -0.0581      | 900  |
|       | cheL:sexm  | 0.0136         | -0.0087      | 0.0404       | 900  |
| M2    | Intercept  | 1.2761         | 1.1072       | 1.4480       | 900  |
|       | cheW       | 0.5668         | 0.5081       | 0.6272       | 900  |
|       | sexm       | -0.0656        | -0.1014      | -0.0363      | 805  |
|       | cheW:sexm  | -0.0337        | -0.0696      | 0.0005       | 900  |
| M3    | Intercept  | 0.2023         | 0.0624       | 0.3322       | 900  |
|       | met5L      | 0.8267         | 0.7681       | 0.8760       | 900  |
|       | sexm       | -0.0493        | -0.1160      | 0.0234       | 900  |
|       | met5L:sexm | -0.0420        | -0.0755      | -0.0001      | 900  |
| M4    | Intercept  | 1.0414         | 0.8626       | 1.2410       | 900  |
|       | met5W      | 0.6400         | 0.5778       | 0.6975       | 900  |
|       | sexm       | -0.0725        | -0.1088      | -0.0367      | 900  |
|       | met5W:sexm | 0.0006         | -0.0321      | 0.0315       | 900  |
| M5    | Intercept  | 0.3500         | 0.2297       | 0.4848       | 1083 |
|       | teL        | 0.7830         | 0.7414       | 0.8263       | 1212 |
|       | sexm       | -0.0804        | -0.1240      | -0.0290      | 862  |
|       | teL:sexm   | 0.0107         | -0.0160      | 0.0378       | 874  |
| M6    | Intercept  | 1.1788         | 1.0365       | 1.3087       | 900  |
|       | teW        | 0.7154         | 0.6698       | 0.7572       | 793  |
|       | sexm       | -0.0591        | -0.0795      | -0.0379      | 818  |
|       | teW:sexm   | 0.0205         | -0.0036      | 0.0467       | 900  |



## Phylogenetic multiple regressions

### Context

The results of several multiple regression models analyzed using a Bayesian phylogenetic approach are presented below. These models were designed to evaluate whether including a secondary predictor improves the accuracy of predictions for total length and carapace length in buthid scorpions - remember that in the previous analyses (main text), **Met5L** and **TeL** appeared as the best single predictor (lowest RMSE values) of total length and carapace length, respectively. The multiple regression models were built using a Bayesian framework with the R package **MCMCg1mm** (Hadfield 2010) accounting for the phylogenetic relationships among species. In essence, these are phylogenetic mixed linear models fitted for trait data with repeated measures (i.e., the species), which were used as the random factor in the analyses. The dataset included natural logarithm values of linear measurements from 195 species.

### Multiple regression for predicting total length

The multiple regression analyses revealed that while adding a second predictor improves the accuracy of total length predictions, the improvement is modest. The RMSE for the model using **Met5L** as the sole predictor was 6.42 mm, corresponding to an average relative error of 13% (with the mean total length in the dataset being 51.28 mm). In comparison, the RMSE for the best multiple regression model, which combines **Met5L** with **CheW**, is 5.13 mm, leading to an average relative error of 10%. Therefore, the addition of a second predictor enhances the accuracy of total length predictions by only 3% at most. ESS = effective sample size.

| Model | RMSE (mm) | Parameter | Posterior Mean | Lower 95% CI | Upper 95% CI | ESS  |
|-------|-----------|-----------|----------------|--------------|--------------|------|
| M4    | 5.129     | Intercept | 2.331          | 2.245        | 2.413        | 900  |
|       |           | met5L     | 0.767          | 0.722        | 0.820        | 900  |
|       |           | cheW      | 0.196          | 0.157        | 0.233        | 900  |
| M3    | 5.147     | Intercept | 2.497          | 2.393        | 2.614        | 1066 |
|       |           | met5L     | 0.619          | 0.558        | 0.681        | 1045 |
|       |           | teW       | 0.344          | 0.279        | 0.395        | 992  |
| M5    | 5.220     | Intercept | 2.235          | 2.137        | 2.330        | 900  |
|       |           | met5L     | 0.783          | 0.729        | 0.833        | 900  |
|       |           | met5W     | 0.204          | 0.157        | 0.251        | 900  |
| M1    | 5.451     | Intercept | 2.165          | 2.063        | 2.247        | 900  |
|       |           | met5L     | 0.472          | 0.400        | 0.552        | 900  |
|       |           | teL       | 0.491          | 0.415        | 0.561        | 900  |
| M2    | 5.637     | Intercept | 2.041          | 1.936        | 2.130        | 900  |
|       |           | met5L     | 0.739          | 0.683        | 0.803        | 900  |
|       |           | cheL      | 0.218          | 0.170        | 0.269        | 900  |

## Multiple regression for predicting carapace length

Similarly, for the multiple regression models predicting carapace length, adding a secondary predictor improved accuracy by only up to 2% at most. The mean carapace length in the dataset was 5.6 mm. ESS = effective sample size.

| Model | RMSE (mm) | Parameter | Posterior Mean | Lower 95% CI | Upper 95% CI | ESS |
|-------|-----------|-----------|----------------|--------------|--------------|-----|
| M5    | 0.559     | Intercept | 0.337          | 0.249        | 0.432        | 665 |
|       |           | teL       | 0.653          | 0.602        | 0.703        | 900 |
|       |           | met5W     | 0.224          | 0.173        | 0.273        | 900 |
| M3    | 0.571     | Intercept | 0.576          | 0.465        | 0.680        | 900 |
|       |           | teL       | 0.493          | 0.425        | 0.561        | 900 |
|       |           | teW       | 0.362          | 0.296        | 0.428        | 900 |
| M4    | 0.577     | Intercept | 0.390          | 0.306        | 0.484        | 817 |
|       |           | teL       | 0.681          | 0.633        | 0.733        | 900 |
|       |           | cheW      | 0.172          | 0.134        | 0.220        | 900 |
| M2    | 0.622     | Intercept | 0.147          | 0.046        | 0.252        | 900 |
|       |           | teL       | 0.702          | 0.640        | 0.760        | 900 |
|       |           | cheL      | 0.150          | 0.102        | 0.210        | 900 |
| M1    | 0.656     | Intercept | 0.188          | 0.071        | 0.282        | 900 |
|       |           | teL       | 0.727          | 0.647        | 0.815        | 900 |
|       |           | met5L     | 0.131          | 0.035        | 0.219        | 900 |

## References

- Esposito, L. A., & Prendini, L. (2019). Island ancestors and new world biogeography: A case study from the scorpions (Buthidae: Centruroidinae). *Scientific Reports*, 9(1), 3500.
- Hadfield J. D. (2010). MCMC Methods for Multi-Response Generalized Linear Mixed Models: The MCM-Cglmm R Package. *Journal of Statistical Software*, 33(2), 1-22. URL <https://www.jstatsoft.org/v33/i02/>.
- Ojanguren-Affilastro, A. A., Adilardi, R. S., Mattoni, C. I., Ramírez, M. J., & Ceccarelli, F. S. (2017). Dated phylogenetic studies of the southernmost American buthids (Scorpiones; Buthidae). *Molecular Phylogenetics and Evolution*, 110, 39–49. <https://doi.org/10.1016/j.ympev.2017.02.018>
